# Supplementary material for: Synergistic Effects of NOTCH/γ-Secretase Inhibition and Standard of Care Treatment Modalities in Non-small Cell Lung Cancer Cells
Source: PubMed Central journal article supplement (PMC6234899; doi:10.3389/fonc.2018.00460), 2018-11-07
Supplement: Data_Sheet_2.pdf [file Data_Sheet_2.pdf]

# Supplementary Figure 1

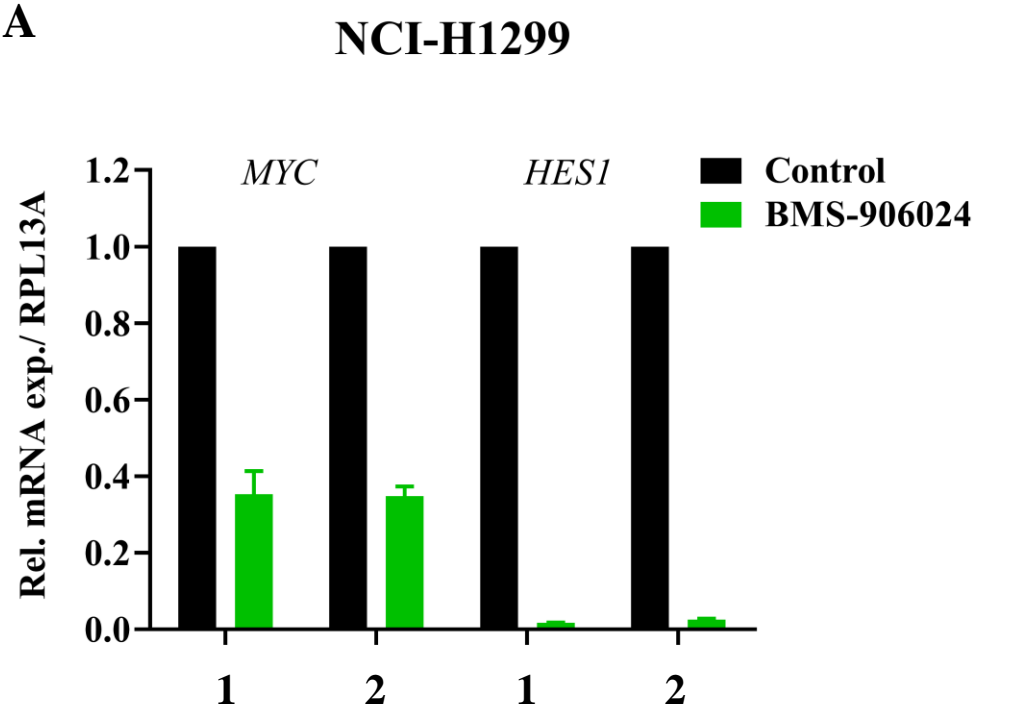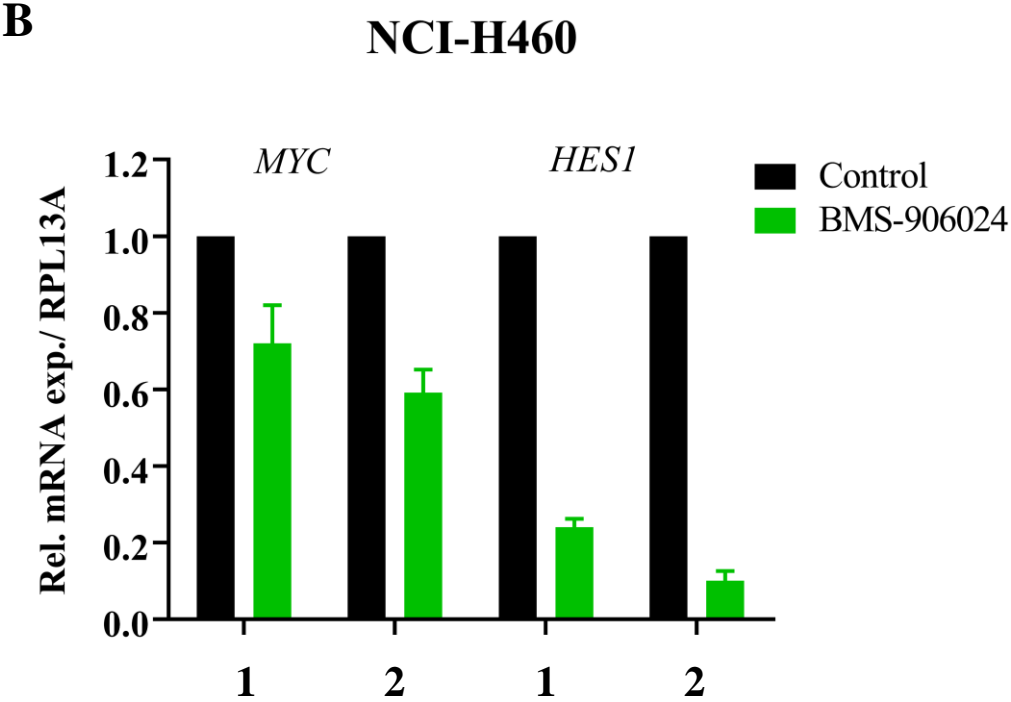

## Supplementary Figure 2

**A**

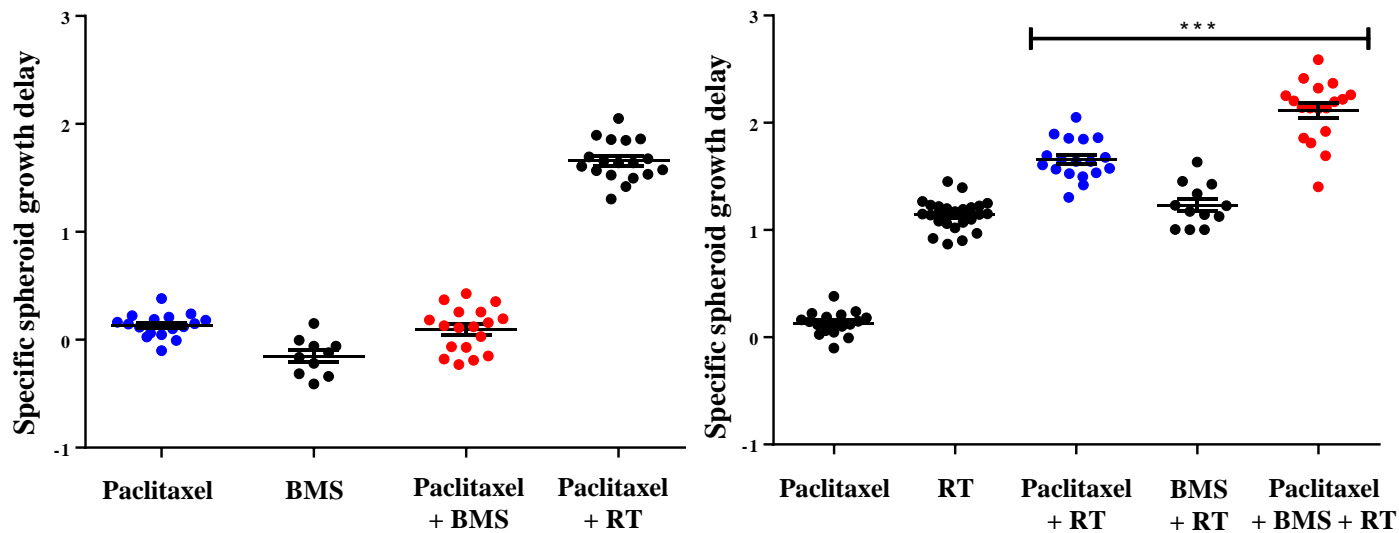

**B**

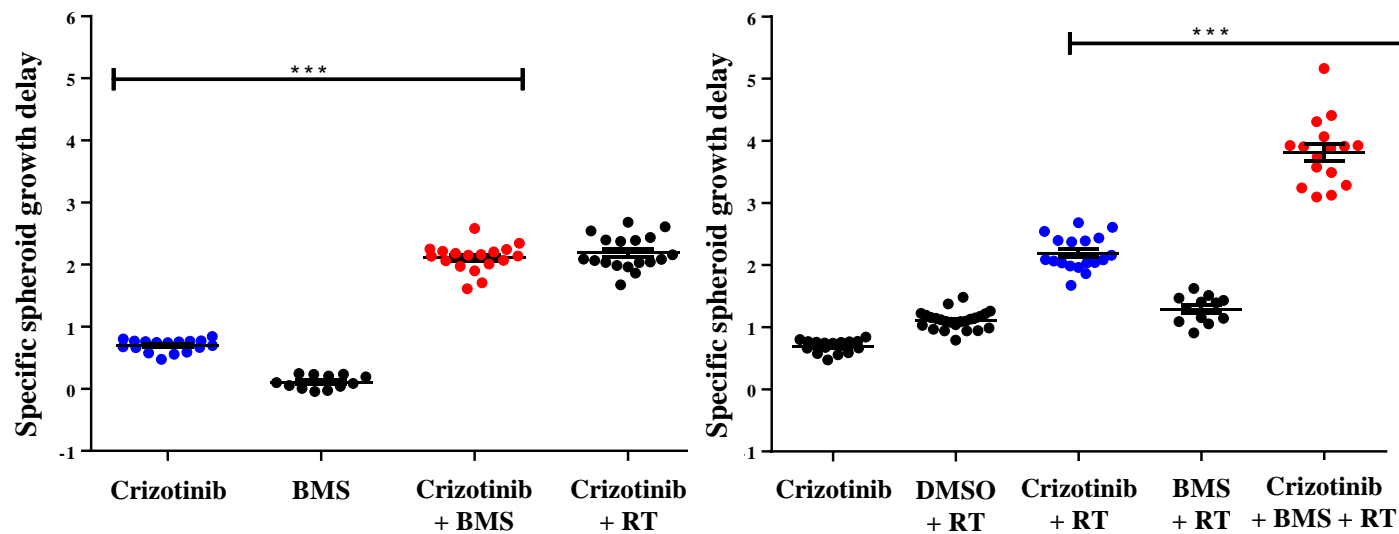

# Supplementary Figure 3

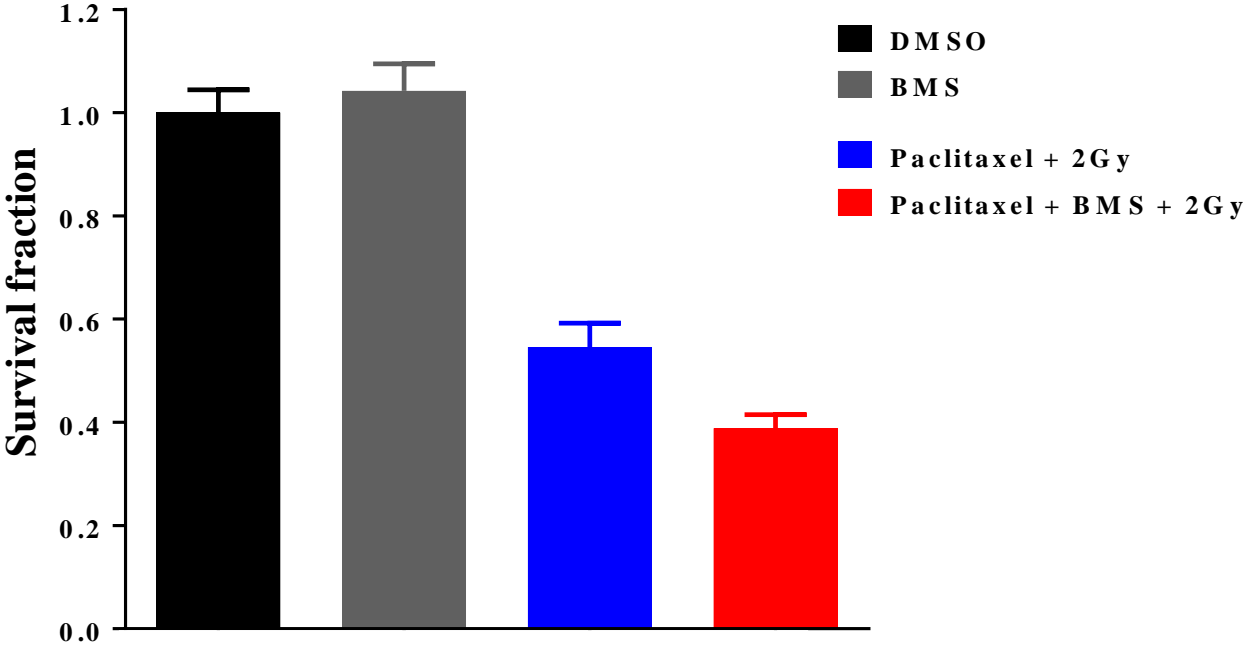

# Supplementary Figure 4

**A**

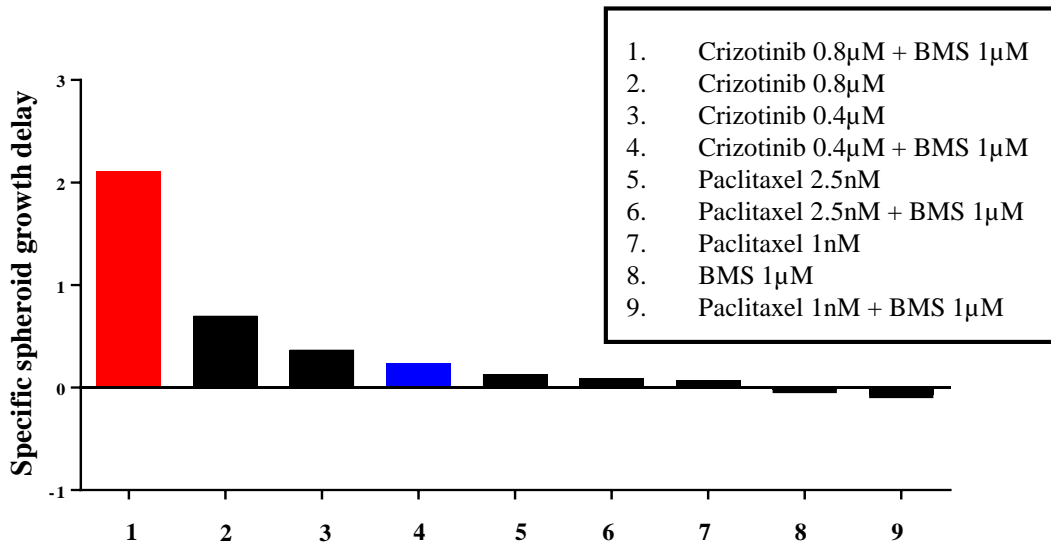

**B**

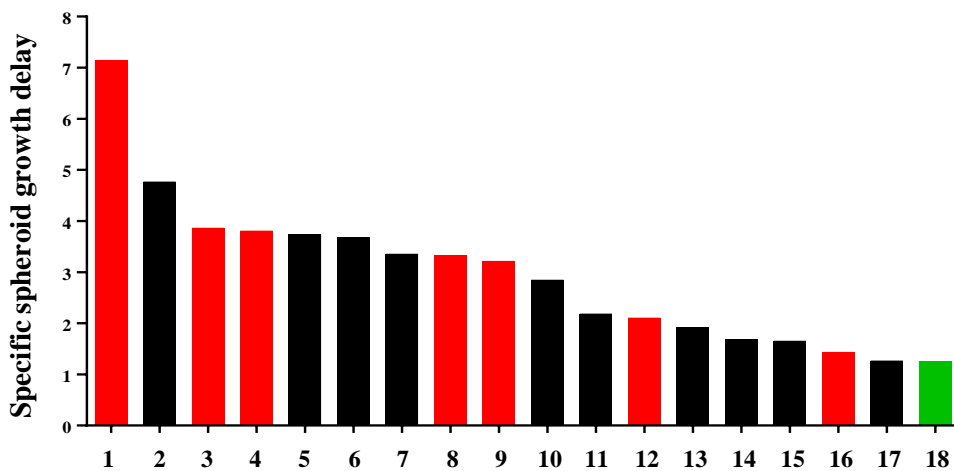

- |                                                 |                                                  |
|-------------------------------------------------|--------------------------------------------------|
| 1. Crizotinib 0.8 $\mu$ M + BMS 1 $\mu$ M + 4Gy | 10. Paclitaxel 1nM + 4Gy                         |
| 2. Crizotinib 0.4 $\mu$ M + BMS 1 $\mu$ M + 4Gy | 11. Crizotinib 0.8 $\mu$ M + 2Gy                 |
| 3. Paclitaxel 2.5nM + BMS 1 $\mu$ M + 4Gy       | 12. Paclitaxel 2.5nM + BMS 1 $\mu$ M + 2Gy       |
| 4. Crizotinib 0.8 $\mu$ M + BMS 1 $\mu$ M + 2Gy | 13. Crizotinib 0.4 $\mu$ M + BMS 1 $\mu$ M + 2Gy |
| 5. Crizotinib 0.8 $\mu$ M + 4Gy                 | 14. Crizotinib 0.4 $\mu$ M + 2Gy                 |
| 6. Crizotinib 0.4 $\mu$ M + 4Gy                 | 15. Paclitaxel 2.5nM + 2Gy                       |
| 7. Paclitaxel 2.5nM + 4Gy                       | 16. Paclitaxel 1nM + BMS 1 $\mu$ M + 2Gy         |
| 8. Paclitaxel 1nM + BMS 1 $\mu$ M + 4Gy         | 17. Paclitaxel 1nM + 2Gy                         |
| 9. BMS 1 $\mu$ M + 4Gy                          | 18. BMS 1 $\mu$ M + 2Gy                          |

**Supplementary Table 1.1**

| <b>DRUG NAME</b>      | <b>Synergistic</b> | <b>Protective</b> | <b>Additive</b> | <b>Toxic</b> | <b>No effects</b> |
|-----------------------|--------------------|-------------------|-----------------|--------------|-------------------|
| Hydroxyurea           |                    |                   |                 |              | X                 |
| Allopurinol           |                    |                   |                 |              | X                 |
| Fluorouracil (5-FU)   |                    |                   |                 |              | X                 |
| Thioguanine           |                    |                   |                 |              | X                 |
| Mercaptopurine        |                    |                   |                 |              | X                 |
| Mechlorethamine HCl   |                    |                   |                 |              | X                 |
| Thiotepa              | X                  |                   |                 |              |                   |
| Aminolevulinic Acid   | X                  |                   |                 |              |                   |
| Dacarbazine           | X                  |                   |                 |              |                   |
| Arsenic Trioxide      | X                  |                   |                 |              |                   |
| Temozolomide          |                    |                   |                 |              | X                 |
| Busulfan              |                    |                   |                 |              | X                 |
| Altretamine           | X                  |                   |                 |              |                   |
| Floxuridine           |                    |                   |                 | X            |                   |
| Methoxsalen           |                    |                   |                 |              | X                 |
| Lomustine; CCNU       |                    |                   |                 |              | X                 |
| Azacitidine           | X                  |                   |                 |              |                   |
| Decitabine            |                    |                   | X               |              |                   |
| Carmustine            | X                  |                   |                 |              |                   |
| Cyclophosphamide      |                    |                   |                 |              | X                 |
| Uracil mustard        |                    |                   | X               |              |                   |
| Cytarabine; Ara-C     |                    |                   |                 | X            |                   |
| Thalidomide           |                    |                   |                 |              | X                 |
| Procarbazine HCl      |                    | X                 |                 |              |                   |
| Streptozocin          | X                  |                   |                 |              |                   |
| Cladribine            | X                  |                   |                 |              |                   |
| Ifosfamide            |                    |                   |                 |              | X                 |
| Cisplatin             |                    |                   |                 |              | X                 |
| Tretinoin             |                    |                   |                 |              | X                 |
| Dexrazoxane HCl       |                    |                   | X               |              |                   |
| Pentostatin           |                    | X                 |                 |              |                   |
| Gemcitabine HCl       |                    |                   |                 |              | X                 |
| Nelarabine            |                    |                   | X               |              |                   |
| Vorinostat            |                    |                   | X               |              |                   |
| Exemestane            |                    |                   | X               |              |                   |
| Anastrozole           |                    |                   |                 |              | X                 |
| Letrozole             | X                  |                   |                 |              |                   |
| Lenalidomide          | X                  |                   |                 |              |                   |
| Chlorambucil          |                    | X                 |                 |              |                   |
| Mitomycin C           |                    |                   |                 |              | X                 |
| Mitotane; o,p'-DDD    |                    |                   | X               |              |                   |
| Clofarabine           |                    |                   |                 | X            |                   |
| Pipobroman            |                    |                   | X               |              |                   |
| Megestrol acetate     | X                  |                   |                 |              |                   |
| Bendamustine HCl      |                    |                   |                 |              | X                 |
| Carboplatin           |                    |                   | X               |              |                   |
| Oxaliplatin           |                    | X                 |                 |              |                   |
| Fludarabine Phosphate |                    |                   |                 |              | X                 |
| Bortezomib            |                    |                   |                 | X            |                   |
| Capecitabine          | X                  |                   |                 |              |                   |

**Supplementary Table 1.2**

| DRUG NAME              | Synergistic | Protective | Additive | Toxic | No effects |
|------------------------|-------------|------------|----------|-------|------------|
| Celecoxib              |             |            | x        |       |            |
| Sunitinib Malate       |             |            | x        |       |            |
| Axitinib               | x           |            |          |       |            |
| Mitoxantrone HCl       |             |            |          | x     |            |
| Pemetrexed Disodium    | x           |            |          |       |            |
| Gefitinib              |             |            |          | x     |            |
| Vismodegib             | x           |            |          |       |            |
| Crizotinib             | x           |            |          |       |            |
| Methotrexate           |             |            |          | x     |            |
| Quinacrine             |             |            | x        |       |            |
| Topotecan HCl          |             |            |          | x     |            |
| Dasatinib              |             |            | x        |       |            |
| Pazopanib HCl          |             |            |          |       | x          |
| Imatinib Mesylate      |             |            |          | x     |            |
| Sorafenib              | x           |            |          |       |            |
| Raloxifene HCl         |             |            | x        |       |            |
| Pralatrexate           |             |            |          | x     |            |
| Vandetanib             |             |            |          | x     |            |
| Vemurafenib            |             |            |          | x     |            |
| Ixabepilone            |             |            |          | x     |            |
| Romidepsin             |             |            |          |       | x          |
| Daunorubicin HCl       |             |            |          |       | x          |
| Doxorubicin HCl        | x           |            |          |       |            |
| Etoposide              | x           |            |          |       |            |
| Tamoxifen Citrate      |             |            | x        |       |            |
| Lapatinib Ditosylate   |             |            | x        |       |            |
| Irinotecan HCl         |             |            | x        |       |            |
| Fulvestrant            |             |            |          |       | x          |
| Teniposide             |             |            |          | x     |            |
| Valrubicin             |             | x          |          |       |            |
| Docetaxel              | x           |            |          |       |            |
| Cabazitaxel            |             |            |          |       | x          |
| Paclitaxel             |             |            |          | x     |            |
| Vinblastine Sulfate    |             |            |          | x     |            |
| Vincristine Sulfate    |             |            |          |       | x          |
| Sirolimus (Rapamycin)  |             | x          |          |       |            |
| Everolimus             |             |            |          | x     |            |
| Dactinomycin           |             |            |          | x     |            |
| Plicamycin             |             |            |          | x     |            |
| Bleomycin              |             |            |          | x     |            |
| Vinorelbine Tartrate   |             |            |          | x     |            |
| Carfilzomib            |             |            |          | x     |            |
| Imiquimod              |             |            |          | x     |            |
| Triethylenemelamine    |             |            |          | x     |            |
| Erlotinib HCl          |             |            |          | x     |            |
| Amifostine             |             |            |          |       | x          |
| Zoledronic Acid        |             |            |          | x     |            |
| Abiraterone            |             |            |          | x     |            |
| Melphalan              |             |            |          | x     |            |
| Nilotinib              |             |            |          | x     |            |
| Estramustine phosphate |             | x          |          |       |            |

# Supplementary Table 2.1

| DRUG NAME             | Synergistic | Protective | Additive | Toxic | No effects |
|-----------------------|-------------|------------|----------|-------|------------|
| Hydroxyurea           |             |            |          |       | X          |
| Allopurinol           |             | X          |          |       |            |
| Fluorouracil (5-FU)   |             | X          |          |       |            |
| Thioguanine           |             |            |          |       | X          |
| Mercaptopurine        |             |            |          |       | X          |
| Mechlorethamine HCl   |             |            |          |       | X          |
| Thiotepa              | X           |            |          |       | X          |
| Aminolevulinic Acid   |             |            |          |       | X          |
| Dacarbazine           |             |            |          |       | X          |
| Arsenic Trioxide      |             | X          |          |       |            |
| Temozolomide          |             | X          |          |       |            |
| Busulfan              |             |            |          |       | X          |
| Altretamine           |             |            |          |       | X          |
| Floxuridine           |             |            |          |       | X          |
| Methoxsalen           |             |            |          |       | X          |
| Lomustine; CCNU       |             |            |          |       | X          |
| Azacitidine           |             | X          |          |       |            |
| Decitabine            |             | X          |          |       |            |
| Carmustine            |             |            |          |       | X          |
| Cyclophosphamide      |             |            |          |       | X          |
| Uracil mustard        |             |            |          |       | X          |
| Cytarabine; Ara-C     |             |            |          | X     |            |
| Thalidomide           |             |            |          |       | X          |
| Procarbazine HCl      |             |            |          |       | X          |
| Streptozocin          |             | X          |          |       |            |
| Cladribine            |             |            |          |       | X          |
| Ifosfamide            |             | X          |          |       |            |
| Tretinoin             |             | X          |          |       |            |
| Dexrazoxane HCl       |             |            |          |       | X          |
| Pentostatin           |             |            |          |       | X          |
| Gemcitabine HCl       |             |            |          | X     |            |
| Nelarabine            |             | X          |          |       |            |
| Vorinostat            |             |            |          |       | X          |
| Exemestane            |             | X          |          |       |            |
| Anastrozole           |             | X          |          |       |            |
| Letrozole             |             |            |          |       | X          |
| Lenalidomide          |             |            |          |       | X          |
| Chlorambucil          |             |            |          |       | X          |
| Mitomycin C           |             |            |          | X     |            |
| Mitotane; o,p'-DDD    |             |            | X        |       |            |
| Clofarabine           | X           |            |          |       |            |
| Pipobroman            |             |            |          |       | X          |
| Megestrol acetate     |             |            |          |       | X          |
| Bendamustine HCl      |             |            |          |       | X          |
| Carboplatin           |             |            |          |       | X          |
| Oxaliplatin           |             |            |          |       | X          |
| Fludarabine Phosphate |             |            | X        |       | X          |
| Bortezomib            |             |            |          | X     |            |
| Capecitabine          |             |            |          |       | X          |

# Supplementary Table 2.2

| DRUG NAME                    | Synergistic | Protective | Additive | Toxic | No effects |
|------------------------------|-------------|------------|----------|-------|------------|
| Celecoxib                    |             |            |          |       | X          |
| Sunitinib Malate             |             |            |          |       | X          |
| Axitinib                     |             |            |          |       | X          |
| Mitoxantrone HCl             |             |            |          |       | X          |
| <b>Pemetrexed Disodium</b>   |             |            | X        |       | X          |
| Gefitinib                    |             |            |          |       | X          |
| Vismodegib                   |             |            |          |       | X          |
| <b>Crizotinib</b>            | X           |            |          |       |            |
| Methotrexate                 |             |            |          |       | X          |
| Quinacrine                   |             |            |          |       | X          |
| Topotecan HCl                |             |            |          |       | X          |
| <b>Dasatinib</b>             |             |            | X        |       |            |
| Pazopanib HCl                |             |            |          |       | X          |
| Imatinib Mesylate            |             |            |          |       | X          |
| Sorafenib                    |             |            |          |       | X          |
| Raloxifene HCl               |             |            |          |       | X          |
| Pralatrexate                 |             |            |          |       | X          |
| Vandetanib                   |             |            |          |       | X          |
| Vemurafenib                  |             |            |          |       | X          |
| Ixabepilone                  |             |            |          |       | X          |
| <b>Romidepsin</b>            |             |            |          | X     | X          |
| <b>Daunorubicin HCl</b>      |             |            |          | X     |            |
| <b>Doxorubicin HCl</b>       |             |            | X        |       |            |
| <b>Etoposide</b>             | X           |            |          |       |            |
| Tamoxifen Citrate            |             |            |          |       | X          |
| Lapatinib Ditosylate         |             |            |          |       | X          |
| <b>Irinotecan HCl</b>        | X           |            |          |       |            |
| <b>Fulvestrant</b>           |             | X          |          |       |            |
| <b>Teniposide</b>            |             |            |          | X     |            |
| <b>Valrubicin</b>            |             |            | X        |       | X          |
| <b>Docetaxel</b>             |             |            | X        | X     |            |
| Cabazitaxel                  |             |            |          |       | X          |
| <b>Paclitaxel</b>            |             |            |          | X     | X          |
| <b>Vinblastine Sulfate</b>   |             |            |          | X     | X          |
| <b>Vincristine Sulfate</b>   |             |            |          | X     |            |
| <b>Sirolimus (Rapamycin)</b> |             |            | X        |       |            |
| <b>Everolimus</b>            |             |            | X        |       |            |
| <b>Dactinomycin</b>          |             |            |          | X     |            |
| <b>Plicamycin</b>            |             |            |          | X     |            |
| <b>Bleomycin</b>             |             |            | X        |       |            |
| <b>Vinorelbine Tartrate</b>  |             |            |          | X     |            |
| <b>Carfilzomib</b>           |             |            |          | X     |            |
| Imiquimod                    |             |            |          |       | X          |
| <b>Triethylenemelamine</b>   |             |            | X        |       |            |
| Erlotinib HCl                |             |            |          |       | X          |
| Amifostine                   |             |            |          |       | X          |
| Zoledronic Acid              |             |            |          |       | X          |
| Abiraterone                  |             |            |          |       | X          |
| Melphalan                    |             |            |          |       | X          |
| Nilotinib                    |             |            |          |       | X          |
| Estramustine phosphate       |             |            |          |       | X          |



# Supplementary Table 3

| H1299           | Chemo Conc. | RT dose (Gy) | Specific spheroid growth delay difference |                          |                           | Synergism    |                |           |
|-----------------|-------------|--------------|-------------------------------------------|--------------------------|---------------------------|--------------|----------------|-----------|
|                 |             |              | Chemo vs Chemo + BMS                      | ChemoRT vs ChemoRT + BMS | BMS + RT vs ChemoRT + BMS | BMS vs Chemo | BMS vs ChemoRT | BMS vs RT |
| Cisplatin<br>x  | 1.25 μM     | 2            | ***                                       | *                        | ***                       | ns           | **             | ns        |
|                 |             | 4            | **                                        | ***                      | ***                       | ns           | ns             | ns        |
|                 | 2.5 μM      | 2            | ns                                        | ***                      | ***                       | **           | ns             | ns        |
|                 |             | 4            | ns                                        | ns                       | ***                       | **           | ns             | ns        |
| Etoposide       | 0.1 μM      | 2            | ***                                       | **                       | *                         | ns           | ns             | ns        |
|                 |             | 4            | ***                                       | ns                       | **                        | ns           | ns (0.0704)    | ns        |
|                 | 0.25 μM     | 2            | ns                                        | ***                      | ***                       | *            | ns             | ns        |
|                 |             | 4            | ns                                        | ns                       | ***                       | *            | ns (0.0535)    | ns        |
| Paclitaxel      | 1 nM        | 2            | ns                                        | ns                       | ns                        | ns           | ns             | ns        |
|                 |             | 4            | ns                                        | ***                      | ns                        | ns           | ***            | ns        |
|                 | 2.5 nM      | 2            | ns                                        | ***                      | ***                       | ns           | ***            | ns        |
|                 |             | 4            | ns                                        | ***                      | **                        | ns           | ***            | ns        |
| Docetaxel       | 1 nM        | 2            | ***<br>(BMS effect)                       | ***                      | **                        | *            | *              | ns        |
|                 |             | 4            | ***<br>(BMS effect)                       | ***                      | ns                        | *            | ns             | ns        |
| Pemetrexed<br>x | 0.25 μM     | 2            | ns                                        | ns                       | ns                        | ns           | ns             | ns        |
|                 |             | 4            | ns                                        | ns                       | ns                        | ns           | ns             | ***       |
|                 | 0.5 μM      | 2            | ns                                        | ns                       | ns                        | ns           | ns             | ns        |
|                 |             | 4            | ns                                        | ns                       | ns                        | ns           | ns             | ***       |
| Crizotinib      | 0.4 μM      | 2            | **                                        | *                        | ***                       | ns           | ns             | ns        |
|                 | 0.8 μM      |              | ns                                        | ***                      | ***                       | ***          | ***            | ns        |

**Supplementary Table 4**

| <b>H460</b>       | <b>Chemo Conc.</b> | <b>RT dose (Gy)</b> | <b>Specific spheroid growth delay difference</b> |                                 |                                  | <b>Synergism</b>    |                       |                  |
|-------------------|--------------------|---------------------|--------------------------------------------------|---------------------------------|----------------------------------|---------------------|-----------------------|------------------|
|                   |                    |                     | <b>Chemo vs Chemo + BMS</b>                      | <b>ChemoRT vs ChemoRT + BMS</b> | <b>BMS + RT vs ChemoRT + BMS</b> | <b>BMS vs Chemo</b> | <b>BMS vs ChemoRT</b> | <b>BMS vs RT</b> |
| <b>Paclitaxel</b> | <b>1 nM</b>        | <b>2</b>            | <i>ns</i>                                        | <i>ns</i>                       | *                                | <i>ns</i>           | ***                   | ***              |
|                   |                    | <b>4</b>            | <i>ns</i>                                        | **                              | <i>ns</i>                        | <i>ns</i>           | **                    | ***              |
|                   | <b>2.5 nM</b>      | <b>2</b>            | <i>ns</i>                                        | ***                             | ***                              | <i>ns</i>           | ***                   | ***              |
|                   |                    | <b>4</b>            | <i>ns</i>                                        | *                               | ***                              | <i>ns</i>           | *                     | ***              |
| <b>Crizotinib</b> | <b>0.4 μM</b>      | <b>2</b>            | <i>ns</i>                                        | **                              | ***                              | ***                 | <i>ns</i>             | <i>ns</i>        |
|                   |                    | <b>4</b>            | <i>ns</i>                                        | ***                             | ***                              | ***                 | <i>ns</i>             | ***              |
|                   | <b>0.8 μM</b>      | <b>2</b>            | ***                                              | ***                             | ***                              | ***                 | ***                   | <i>ns</i>        |
|                   |                    | <b>4</b>            | ***                                              | ***                             | ***                              | ***                 | ***                   | ***              |

## Supplementary Table 5

| <b>Product</b>                                        | <b>Company</b>         | <b>Cat. Number</b> |
|-------------------------------------------------------|------------------------|--------------------|
| <b>DMEM High glucose with L-glutamine</b>             | Westburg               | BE12-604F          |
| <b>RPMI 1640 with L-glutamine</b>                     | Westburg               | BE12-702F          |
| <b>Fetal Bovine serum</b>                             | Sigma-Aldrich          | F7524              |
| <b>Puromycin (solution) 100 mg</b>                    | InvivoGen, Bio-Connect | ant-pr-1           |
| <b>Crizotinib</b>                                     | Selleckchem            | s1068              |
| <b>DMSO</b>                                           | Sigma-Aldrich          | 41639              |
| <b>CELLSTAR® 96-multiwell plates</b>                  | Greiner                | 655180             |
| <b>CELLSTAR® 12-multiwell plates</b>                  | Greiner                | 665180             |
| <b>Bradford Protein Assay Dye reagent</b>             | Bio-Rad                | 5000006            |
| <b>Trizma® base</b>                                   | Sigma-Aldrich          | T6066-1KG          |
| <b>HCl</b>                                            | Sigma-Aldrich          | H1758-500ml        |
| <b>NaCl</b>                                           | Sigma-Aldrich          | S3014-1KG          |
| <b>Nonidet P-40</b>                                   | Affymetrix USB         | 19628              |
| <b>Sodium deoxycholate</b>                            | Sigma-Aldrich          | 30970-25G          |
| <b>SDS</b>                                            | Bio-Rad                | 1610418            |
| <b>Sodium Fluoride</b>                                | Sigma-Aldrich          | S1504-500g         |
| <b>Sodium orthovanedate</b>                           | Sigma-Aldrich          | S6508-10g          |
| <b>Tween® 20</b>                                      | VWR                    | 8221841000         |
| <b>PVDF membrane</b>                                  | VWR                    | 10600023           |
| <b>Anti-Cleaved NOTCH 1 Val1744 (D388) mAb rabbit</b> | Bioke                  | 4147S              |
| <b>Anti-Lamin A (C-terminal) rabbit</b>               | Sigma-Aldrich          | L1293-200ul        |
| <b>Goat anti-rabbit IgG HRP-linked</b>                | Bioke                  | 7074S              |
| <b>Amersham ECL™ prime WB detection reagent</b>       | Sigma-Aldrich          | gerpn2232          |
| <b>Agarose for MCTS, Low electroendosmosis</b>        | Sigma-Aldrich          | A9539-100G         |
| <b>96-multiwell Ultra-Low attachment plates</b>       | Corning, BioScience    | 7007               |
